# Supplementary material for: A luminescence switch-on assay for the detection of specific gene deletion using G-quadruplex DNA and silver nanoclusters
Source: Royal Society of Chemistry journal article supplement (doi:10.1039/c6qm00068a), 2016-08-17

## Electronic Supporting Information

# A luminescent switch-on assay for the detection of specific gene deletion using G-quadruplex DNA and silver nanoclusters

Modi Wang,<sup>‡a</sup> Wanhe Wang,<sup>‡a</sup> Chenfu Liu,<sup>a</sup> Jinbiao Liu,<sup>a</sup> Tian-Shu Kang,<sup>b</sup>  
Chung-Hang Leung<sup>b</sup> and Dik-Lung Ma<sup>\*a</sup>

<sup>a</sup> Department of Chemistry, Hong Kong Baptist University, Kowloon Tong, Hong Kong, China. E-mail: [edmondma@hkbu.edu.hk](mailto:edmondma@hkbu.edu.hk).

<sup>b</sup> State Key Laboratory of Quality Research in Chinese Medicine, Institute of Chinese Medical Sciences, University of Macau, Macao, China. E-mail: [duncanleung@umac.mo](mailto:duncanleung@umac.mo).

<sup>‡</sup> These authors contributed equally to this work.

## Experimental section

### Emission measurement

A mixture of P1, P2 and mutant DNA or wild-type DNA was mixed in hybridization buffer (50 mM Tris containing 50 mM KNO<sub>3</sub>, pH 7.0). The mixture was annealed at 95 °C for 10 min, and was slowly cooled to 25 °C. The mixture solution was then added with AgNO<sub>3</sub> and NaBH<sub>4</sub> to produce silver nanoclusters. In the emission measurement, 100 μL of the DNA mixture stock solution was diluted with 400 μL of Tris buffer (50 mM, 50 mM KNO<sub>3</sub>, pH 7.0). The mixture was allowed to equilibrate at 25 °C for 10 min. Luminescence emission spectra were recorded on a PTI QM-4 spectrofluorometer at 25 °C.

**Table S1.** DNA sequences used in this project.

|                      | Sequence                                                                                                                                                                                                               |
|----------------------|------------------------------------------------------------------------------------------------------------------------------------------------------------------------------------------------------------------------|
| P1 (c-kit1)          | 5'-GACA <sub>2</sub> CGACACAGTG <sub>4</sub> AG <sub>3</sub> CGCTG <sub>3</sub> AG <sub>2</sub> AG <sub>3</sub> -3'                                                                                                    |
| P2                   | 5'-C <sub>3</sub> T <sub>2</sub> A <sub>2</sub> TC <sub>4</sub> AC <sub>3</sub> TCA <sub>2</sub> CA <sub>2</sub> GCTA-3'                                                                                               |
| LMP1 wild type DNA   | 5'-<br>TAGCT <sub>2</sub> GT <sub>2</sub> GAG <sub>3</sub> TGCG <sub>3</sub> AG <sub>3</sub> AGTCATCGTG <sub>2</sub> TG <sub>2</sub> TGT <sub>2</sub> CAT<br>CACTGTGTCGT <sub>2</sub> GTC-3'                           |
| LMP1 mutant type DNA | 5'-TAGCT <sub>2</sub> GT <sub>2</sub> GAG <sub>3</sub> CACTGTGTCGT <sub>2</sub> GTC-3'                                                                                                                                 |
| P1 (c-kit87up)       | 5'-GACA <sub>2</sub> CGACACAGTGAG <sub>3</sub> AG <sub>3</sub> CGCTG <sub>3</sub> AG <sub>2</sub> AG <sub>3</sub> -3'                                                                                                  |
| P1 (TBA)             | 5'-GACA <sub>2</sub> CGACACAGTG <sub>3</sub> T <sub>2</sub> G <sub>2</sub> TGTG <sub>2</sub> T <sub>2</sub> G <sub>2</sub> -3'                                                                                         |
| P1 (Pu22)            | 5'-GACA <sub>2</sub> CGACACAGTGTGAG <sub>3</sub> TG <sub>4</sub> AG <sub>3</sub> TG <sub>4</sub> A <sub>2</sub> -3'                                                                                                    |
| P1 (Pu27)            | 5'-GACA <sub>2</sub> CGACACAGTGTG <sub>4</sub> AG <sub>3</sub> TG <sub>4</sub> AG <sub>3</sub> TG <sub>4</sub> A <sub>2</sub> G <sub>2</sub> -3'                                                                       |
| P1 (HTS)             | 5'-GACA <sub>2</sub> CGACACAGTGT <sub>2</sub> AG <sub>3</sub> T <sub>2</sub> AG <sub>3</sub> T <sub>2</sub> AG <sub>3</sub> T <sub>2</sub> AG <sub>3</sub> -3'                                                         |
| P1 (PS2.M)           | 5'-GACA <sub>2</sub> CGACACAGTG <sub>2</sub> TG <sub>3</sub> TAG <sub>3</sub> CG <sub>3</sub> T <sub>2</sub> G <sub>2</sub> -3'                                                                                        |
| LMP1 mutant DNA-5    | 5'-<br>TAGCT <sub>2</sub> GT <sub>2</sub> GAG <sub>3</sub> TGCG <sub>3</sub> AG <sub>3</sub> AGTCATCGTG <sub>2</sub> TG <sub>2</sub> TGCACTG<br>TGTCGT <sub>2</sub> GTC-3'                                             |
| LMP1 mutant DNA-10   | 5'-<br>TAGCT <sub>2</sub> GT <sub>2</sub> GAG <sub>3</sub> TGCG <sub>3</sub> AG <sub>3</sub> AGTCATCGTG <sub>2</sub> CACTGTGTC<br>GT <sub>2</sub> GTC-3'                                                               |
| LMP1 mutant DNA-15   | 5'-<br>TAGCT <sub>2</sub> GT <sub>2</sub> GAG <sub>3</sub> TGCG <sub>3</sub> AG <sub>3</sub> AGTCATCACTGTGTCGT <sub>2</sub> GT<br>C-3'                                                                                 |
| LMP1 mutant DNA-20   | 5'-TAGCT <sub>2</sub> GT <sub>2</sub> GAG <sub>3</sub> TGCG <sub>3</sub> AG <sub>3</sub> ACACTGTGTCGT <sub>2</sub> GTC-3'                                                                                              |
| LMP1 mutant DNA-25   | 5'-TAGCT <sub>2</sub> GT <sub>2</sub> GAG <sub>3</sub> TGCG <sub>3</sub> CACTGTGTCGT <sub>2</sub> GTC-3'                                                                                                               |
| CCR5 wild type DNA   | 5'-<br>CTCAT <sub>4</sub> C <sub>2</sub> ATACAGTCAGTATCA <sub>2</sub> T <sub>2</sub> CTG <sub>2</sub> A <sub>2</sub> GA <sub>2</sub> T <sub>3</sub> C <sub>2</sub> AGAC<br>AT <sub>2</sub> A <sub>3</sub> GATAGTCAT-3' |
| CCR5 mutant type DNA | 5'-CTCAT <sub>4</sub> C <sub>2</sub> ATACAT <sub>2</sub> A <sub>3</sub> GATAGTCAT-3'                                                                                                                                   |
| CCR5-P1 (c-kit1)     | 5'-ATGACTATCT <sub>3</sub> A <sub>2</sub> TAG <sub>3</sub> AG <sub>3</sub> CGCTG <sub>3</sub> AG <sub>2</sub> AG <sub>3</sub> -3'                                                                                      |
| CCR5-P2              | 5'-C <sub>3</sub> T <sub>2</sub> A <sub>2</sub> TC <sub>5</sub> GTATG <sub>2</sub> A <sub>4</sub> TGAG-3'                                                                                                              |



**Figure S1** Emission spectra of the system (5  $\mu$ M P1 and P2) in the presence of the mutant DNA (5  $\mu$ M) or wild-type (5  $\mu$ M) DNA.

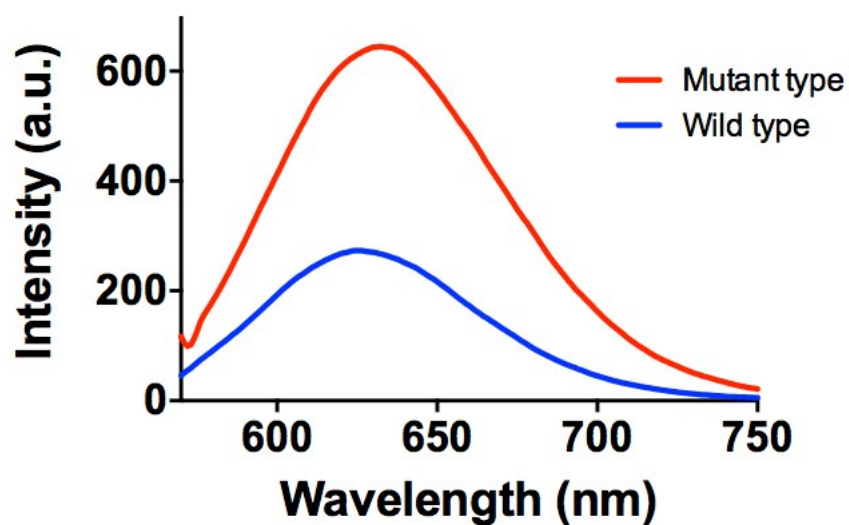

**Figure S2** Relative luminescence intensity of the system with different concentrations of  $\text{KNO}_3$  (10, 20, 50 and 100 mM).

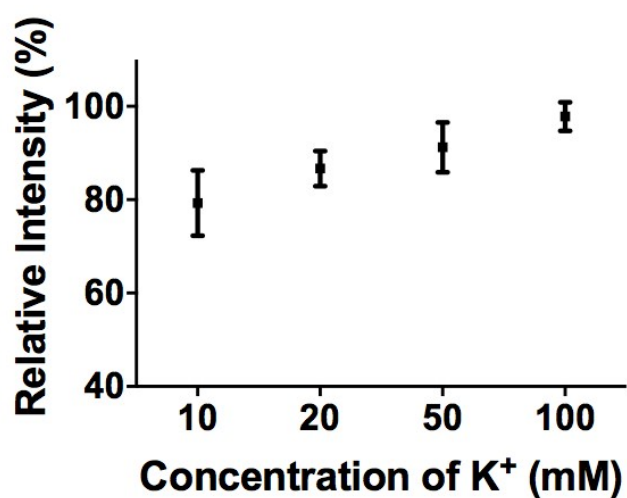

**Figure S3** Relative luminescence intensity at  $\lambda = 630$  nm of the system utilizing  $5 \mu\text{M}$  P2 (with poly-C) and P2' (without C).

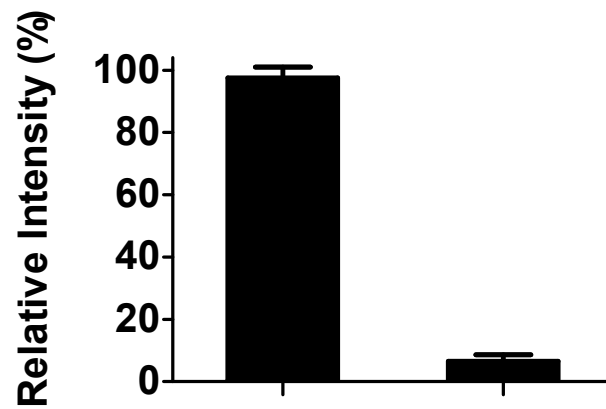

**Figure S4** Emission spectra of the system ( $5 \mu\text{M}$  P1 and P2) in the presence of CCR5 mutant DNA ( $5 \mu\text{M}$ ) or CCR5 wild-type DNA ( $5 \mu\text{M}$ ).

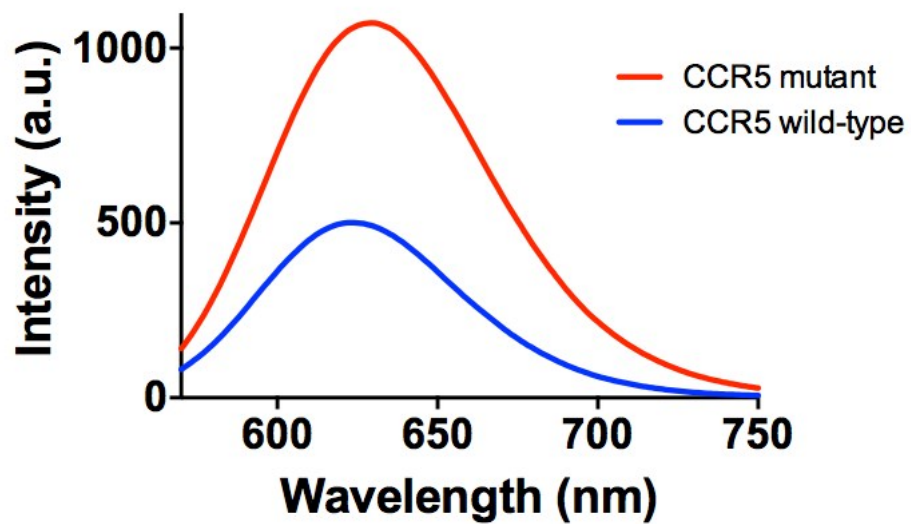

**Figure S5** Time course of luminescence response of AgNC in the presence/absence of G-rich sequence in buffer (black) and serum sample (red).

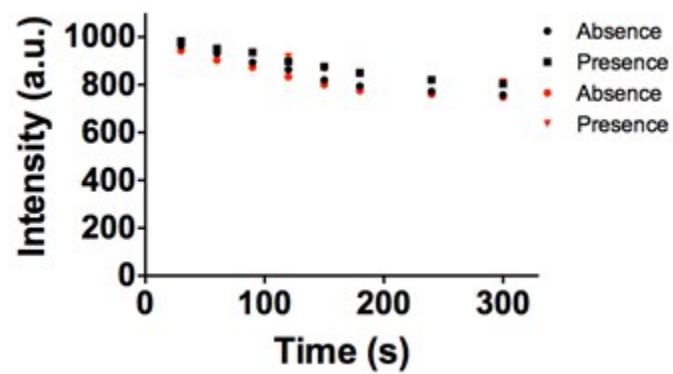

Supplement: c6qm00068a1.pdf [file c6qm00068a1.pdf]
